# Supplementary material for: Association Between Hyperglycemia at Admission During Hospitalization for Acute Myocardial Infarction and Subsequent Diabetes: Insights From the Veterans Administration Cardiac Care Follow-up Clinical Study
Source: Oxford University Press journal article supplement (doi:10.2337/dc13-1125), 2013-10-03
Supplement: dc131125supplementarydata.pdf [file dc131125supplementarydata.pdf]

SUPPLEMENTARY DATA

**Supplementary Table 1.** Modality of diagnosis of diabetes stratified by enrollment prior to or after June 2009.

| Time of diabetes diagnosis                                             | Patients with ONLY HbA1c $\geq$ 6.5% (48mmol/mol) | Patients with at least one ICD-9-CM code (250.xx) or prescription for glucose-lowering medication | p value |
|------------------------------------------------------------------------|---------------------------------------------------|---------------------------------------------------------------------------------------------------|---------|
| <b>Patients enrolled prior to June 2009</b>                            |                                                   |                                                                                                   |         |
| During index hospitalization (N=112)                                   | 99 (88.4%)                                        | 13 (11.6%)                                                                                        | <0.0001 |
| During index hospitalization and six months after discharge (N=450)    | 186 (41.3%)                                       | 264 (58.7%)                                                                                       | <0.0001 |
| During index hospitalization and twelve months after discharge (N=676) | 258 (38.2%)                                       | 418 (61.8%)                                                                                       | <0.0001 |
| <b>Patients enrolled after June 2009</b>                               |                                                   |                                                                                                   |         |
| During index hospitalization (N=57)                                    | 52 (91.2%)                                        | 5 (8.8%)                                                                                          | <0.0001 |
| During index hospitalization and six months after discharge (N=201)    | 81 (40.3%)                                        | 120 (59.7%)                                                                                       | <0.0001 |
| During index hospitalization and twelve months after discharge (N=288) | 103 (35.8%)                                       | 185 (64.2%)                                                                                       | <0.0001 |

SUPPLEMENTARY DATA

**Supplementary Table 2.** Association between various glucose metrics and evidence of diabetes at six-months following acute myocardial infarction.

| <b>Glucose metric Used</b>                                     | <b>Adjusted OR (95% CI)</b> |
|----------------------------------------------------------------|-----------------------------|
| <b>Patients enrolled prior to June 2009</b>                    |                             |
| Admission glucose $\geq 140$ mg/dL                             | 2.40 (1.93 – 2.98)          |
| Mean glucose $\geq 140$ mg/dL                                  | 5.20 (4.10 – 6.74)          |
| Peak glucose $\geq 180$ mg/dL                                  | 2.88 (2.34 – 3.56)          |
| <b>Patients enrolled after June 2009</b>                       |                             |
| Admission glucose $\geq 140$ mg/dL                             | 3.04 (2.22 – 4.16)          |
| Mean glucose $\geq 140$ mg/dL                                  | 7.79 (5.32 – 11.40)         |
| Peak glucose $\geq 180$ mg/dL                                  | 3.55 (2.57 – 4.91)          |
| <b>Patients with evidence of diabetes AFTER discharge only</b> |                             |
| Admission glucose $\geq 140$ mg/dL                             | 2.07 (1.68 – 2.55)          |
| Mean glucose $\geq 140$ mg/dL                                  | 4.25 (3.31 – 5.44)          |
| Peak glucose $\geq 180$ mg/dL                                  | 2.46 (2.00 – 3.02)          |
